# Supplementary material for: Acrylic coatings with surprising antifogging and frost-resisting properties
Source: Royal Society of Chemistry journal article supplement (doi:10.1039/c3cc46561f), 2013-01-01
Supplement: c3cc46561f.pdf [file c3cc46561f.pdf]

## Supplementary Information

### Acrylic coatings with surprising antifogging and frost-resisting properties

Jie Zhao,<sup>a</sup> Anthony Meyer,<sup>a</sup> Li Ma,<sup>b</sup> and Weihua Ming<sup>\*a</sup>

<sup>a</sup>Department of Chemistry, <sup>b</sup>Department of Physics, Georgia Southern University, P.O. Box 8064, Statesboro, GA 30460, USA

*\*Email: wming@georgiasouthern.edu*

#### Synthesis and properties of poly(MMA-co-DMAEMA)

The poly(MMA-co-DMAEMA) copolymers were synthesized by free radical solution polymerization. Methyl methacrylate (MMA) and 2-(dimethylamino)ethyl methacrylate (DMAEMA), with different DMAEMA contents (50, 60, 70, and 80 mol%), were first dissolved in ethanol (10 wt%) in a 250-mL flask, followed by the addition of AIBN (the initiator, 0.5 wt% with respect to the total monomer mass). The reaction solution was then purged by Argon for 20 min, and the polymerization was carried out at 70 °C for 24 h. After polymerization, the product was precipitated and washed in hexane to remove possible unreacted monomer. The resultant copolymer was dried at 50 °C for 48 h in a vacuum oven. The content of the DMAEMA unit in the purified copolymers was determined by <sup>1</sup>H-NMR to be 50%, 58%, 67% and 76%, respectively, which agreed with the theoretical values (50, 60, 70, and 80 mol%) quite well. Typical properties of the copolymers are listed below.

*Physical properties of poly(MMA-co-DMAEMA) copolymers*

|              | $M_n$ | PDI | $T_g$ (°C) |
|--------------|-------|-----|------------|
| Copolymer-80 | 20000 | 3.2 | 29         |
| Copolymer-70 | 21000 | 2.5 | 40         |
| Copolymer-60 | 29000 | 1.8 | 54         |
| Copolymer-50 | 33000 | 1.9 | 62         |

(Molecular weight determined by GPC, again PS standards;  $T_g$  by DSC)

### **Preparation of copolymer coatings with PEGDMA cross-linked network**

Ethylene glycol dimethacrylate (EGDMA, at 0.1, 0.5, 1.0 and 2 wt% relative to the copolymer) was co-dissolved with the copolymer in toluene (10 wt%), followed by the addition of a UV initiator, 2-hydroxy-4'-(2-hydroxyethoxy)-2-methyl propiophenone (1 wt% relative to EGDMA). The solution was then spin-coated on clean glass slides (1.5cm × 1.5cm) at 500 rpm for 15 s. The coating was cured under UV irradiation in a UVP CL-1000 Ultraviolet Crosslinker apparatus (365 nm, 15 w) for 45 min, and dried in a vacuum oven overnight. The final coatings were labeled as Copolymer-50, Copolymer-60, Copolymer-70, and Copolymer-80, respectively, depending on the molar content of the DMAEMA content.

### **Control glass**

Glass slides (1.5 cm × 1.5cm) were cleaned ultrasonically for 5 min, and then placed in a freshly prepared solution of concentrated H<sub>2</sub>SO<sub>4</sub> and 30 vol% H<sub>2</sub>O<sub>2</sub> (7/3, v/v) at 80 °C for 1 h to remove organic contaminants and generate free hydroxyl groups on the surface. The glass slides were then rinsed with ultrapure water and ethanol, and dried with airflow.

### **Rf-modified glass**

To render glass slides hydrophobic, the cleaned slide was chemically modified with *1H,1H,2H,2H*-perfluorodecyl trichlorosilane via the chemical vapor deposition at 100 °C for 20 min in sealed vials. At the end of reaction, the treated slides were rinsed with anhydrous toluene, sonicated for 5 min to remove residue, and then dried in an oven at 100 °C for 30 min. The hydrophobic glass slide was labeled as Rf-modified glass in the manuscript.
